## Effect modification by region in the associations of *LEP G2548A* and *LEPR Q223R* polymorphisms with statin-induced CK elevation

Shanqun Jiang<sup>1,2</sup>, Scott A. Venners<sup>3</sup>, Kang Li<sup>1</sup>, Yi-Hsiang Hsu<sup>4,5</sup>, Justin Weinstock<sup>6</sup>, Yanfeng Zou<sup>7</sup>, Faming Pan<sup>7</sup> and Xiping Xu<sup>2,8</sup>

<sup>1</sup>School of Life Sciences, Anhui University, Hefei, China

<sup>2</sup>Institute of Biomedicine, Anhui Medical University, Hefei, China

<sup>3</sup>Faculty of Health Sciences, Simon Fraser University, Burnaby, BC, Canada

<sup>4</sup>Institute for Aging Research, HSL and Harvard Medical School, Boston, MA, USA

<sup>5</sup>Molecular and Integrative Physiological Sciences Program, Harvard School of Public Health, Boston, MA, USA

<sup>6</sup>Department of Statistics, University of Virginia, Charlottesville, VA, USA

<sup>7</sup>Department of Epidemiology and Biostatistics, School of Public Health, Anhui Medical University, Hefei, China

<sup>8</sup>Division of Epidemiology and Biostatistics, University of Illinois at Chicago School of Public Health, Chicago, IL, USA

**Correspondence to:** Shanqun Jiang, **email:** shanqunjiang2014@163.com

**Keywords:** *LEP G2548A*; *LEPR Q223R*; creatine kinase; hyperlipidemia; simvastatin

**Received:** August 24, 2017

**Accepted:** October 28, 2017

**Published:** November 18, 2017

**Copyright:** Jiang et al. This is an open-access article distributed under the terms of the Creative Commons Attribution License 3.0 (CC BY 3.0), which permits unrestricted use, distribution, and reproduction in any medium, provided the original author and source are credited.

### ABSTRACT

**We investigated the associations of *LEP G2548A* and *LEPR Q223R* polymorphisms with statin-induced creatine kinase (CK) elevation among Chinese patients with hyperlipidemia. A total of 587 enrolled individuals were treated with 20 mg/d oral simvastatin for 8 consecutive weeks. Genotyping of *LEP G2548A* and *LEPR Q223R* were conducted using PCR-RFLP. Multiple regression analyses showed that, in the Dongzhi region only, patients carrying the *LEP AA* genotype had a significantly greater increase in CK levels compared to those carrying the *AG+GG* genotypes after four weeks ( $P = 0.004$ ) and eight weeks ( $P < 0.001$ ) consecutive simvastatin treatment. Patients were further divided into three groups based on the tertiles of the CK distribution. Compared to subjects in the lowest tertile of CK elevation, the adjusted relative odds of having the *AG+GG* genotypes among subjects in the highest tertile was 0.5 (95% CI, 0.3 to 0.7) and 0.4 (95% CI, 0.2 to 0.6) after the fourth and eighth weeks, respectively. The interaction terms between the Beijing or Dongzhi region and the *LEP GA+AA* genotypes were marginally significant for CK elevation at the fourth week ( $P = 0.057$ ) and significant for CK elevation at the eighth week ( $P = 0.002$ ). The adverse effect of the *LEP G2548A* polymorphism on increasing CK levels may be dependent on the environmental milieu. It suggests that lifestyle interventions might offset the side effects of simvastatin therapy among those with genetic susceptibility. Further research is needed to identify specific individual-level factors for clinical practice that modify the effect of genotype.**

### INTRODUCTION

3-hydroxy-3-methylglutaryl-coenzyme A (HMG-CoA) reductase inhibitors, commonly known as statins, are believed to inhibit cholesterol biosynthesis and are thus the most widely used cholesterol-lowering drugs to treat

hypercholesterolemia [1, 2]. Statins disturb cholesterol biosynthesis by hindering the activity of HMG-CoA reductase in the rate-limiting step of cholesterol synthesis. This inhibition leads to increased levels of low-density lipoprotein (LDL) receptors, which results in increased uptake and degradation of low-density lipoprotein

cholesterol (LDL-C), reduced cholesterol accumulation, and decreased lipoprotein secretion and cholesterol synthesis.

Despite efficiently lowering cholesterol levels, reducing clinical cardiovascular events by 20% to 50% [3], and having a positive benefit-risk ratio, statins are used with caution [4, 5] because they are known to induce adverse muscular events ranging from nonspecific myalgia to rhabdomyolysis. The Prediction of Muscular Risk in Observational Conditions study found that 10.5% of patients using statins experienced muscular symptoms [6]. Serum creatine kinase (CK) was often measured as a proxy to identify the severity of statin-induced myotoxicity. Moreover, for individuals with serum CK concentrations exceeding threefold the upper normal limit (UNL), CK levels and muscle damage have been closely related [7, 8]. Rhabdomyolysis, the most serious muscular event tied to statins, is caused by muscle fiber breakdown with dramatic elevations in CK exceeding 10×UNL. Though statins currently on the market do not lead to rhabdomyolysis as often, the disease prevalence is not insignificant. Atorvastatin is present in 12% of all cases, while simvastatin accounts for about 25% [9]. To date, studies are yet to identify biomarkers of increased CK elevation risk. Genetic variants are likely to provide some evidence for explaining the inter-individual variability of myotoxicity in response to simvastatin.

CK is an enzyme found in multiple tissues and cell types. CK catalyzes the conversion of creatine (Cr) and creates phosphocreatine (PCr) and adenosine diphosphate (ADP) using adenosine triphosphate (ATP). This is an important mechanism in the cellular energy supply chain for safeguarding in tissues with inconstant energy demands, namely skeletal and cardiac muscle [10]. CK and the adenosine 5'-monophosphate-activated protein kinase (AMPK) systems coordinate to maintain energy homeostasis [11]. The CK system provides a rapid response to energy challenges, while AMPK mediates medium and long-term adaptations [12]. Increased intracellular AMP : ATP and Cr : PCr ratios promote AMPK activation, which indicates insufficient cellular energy [13, 14]. AMPK then phosphorylates and inactivates the muscle-specific isoform of CK (MM-CK) [13]. The PCr system quickly replenishes ATP levels during energy-demanding processes. Evidence has shown that leptin can phosphorylate and activate AMPK [15]. Thus we speculate that leptin may play a role in regulating CK levels.

The *LEP* gene, located at chromosome 7q31.3 and consisting of three exons separated by two introns, encodes a 16 kDa protein, leptin. Leptin binds and activates its receptor, *LEPR*, in the hypothalamus. *LEPR* is a single transmembrane protein distributed in many types of tissues with the gene located at chromosome 1p31 in the hypothalamus [16]. The common *G2548A* polymorphism of the *LEP* gene has been tied to serum leptin and BMI in obese individuals [17, 18]. This polymorphism may

alter leptin expression at the transcriptional level and induce the adipose secretion levels of the hormone [19]. Additionally, the *Q223R* polymorphism of the *LEPR* gene has been associated with leptin levels, BMI, fat mass and blood pressure [20].

Regardless of a genetic predisposition to complex traits such as vascular diseases and their therapeutic efficacy, much evidence has also shown that a healthy lifestyle, which includes not smoking, avoiding obesity, physical activity, and a healthy diet pattern, has markedly reduced rates of incident cardiovascular events [21, 22]. Moreover, genetic risk might be attenuated by a favorable lifestyle. Khera *et al.* analyzed data for participants in three prospective cohorts and one cross-sectional study to find that both genetic and lifestyle factors contribute to individual-level risk of coronary artery disease, but increased genetic risk can be offset largely by a healthy lifestyle [23].

In the present study, we became the first group to investigate the effects of the *LEP G2548A* and *LEPR Q223R* polymorphisms on the safety of statin-induced CK elevation in Chinese patients with primary hyperlipidemia, as well as their interactions with regions differing in economic and lifestyle factors.

## RESULTS

### Baseline clinical and epidemiologic characteristics

In total, we recruited 734 patients with primary hyperlipidemia, but excluded 147 subjects from Beijing without genotypic data due to the degradation of one batch of samples in storage. This left 587 patients with primary hyperlipidemia who were selected in this study. We compared the difference between the included and excluded Beijing subjects on the basic characteristics. The measured characteristics of participants from Beijing with genotype data versus those without genotype data are mostly similar, as shown in Supplementary Table 1. For the 587 observed patients, baseline clinical and epidemiologic characteristics grouped by region were shown in Table 1. For the variables age, BMI, WC, SBP, fasting glucose, HDL, LDL, and CK, significant differences were observed between the Beijing and Dongzhi cohorts. The distributions of gender, education, occupation, cigarette smoking, alcohol drinking and work intensity were also significantly different between Beijing and Dongzhi (all  $P < 0.001$ ). However, no significant differences in DBP, TC and TG levels were detected across the two regions.

### Association between *LEP G2548A* and *LEPR Q223R* polymorphisms and baseline CK levels

The results were shown in Table 2. Multiple linear regression analysis demonstrated that neither the *LEP*

**Table 1: Epidemiologic characteristics in Beijing and Dongzhi regions**

| Variables                             | Beijing<br>(N = 195) | Dongzhi<br>(N = 392) | P value      |
|---------------------------------------|----------------------|----------------------|--------------|
|                                       | Mean ± SD            | Mean ± SD            |              |
| Age (years)                           | 54.8 ± 9.4           | 51.2 ± 7.0           | <0.001       |
| BMI <sup>a</sup> (kg/m <sup>2</sup> ) | 24.9 ± 3.3           | 23.9 ± 2.8           | <0.001       |
| WC (m)                                | 0.9 ± 0.1            | 0.9 ± 0.1            | <b>0.043</b> |
| SBP (mmHg)                            | 122.7 ± 15.9         | 129.1 ± 21.6         | <0.001       |
| DBP (mmHg)                            | 78.7 ± 8.7           | 77.4 ± 11.6          | 0.175        |
| Fasting glucose (mmol/L)              | 5.4 ± 0.7            | 5.8 ± 0.5            | <0.001       |
| TG (mmol/L)                           | 2.0 ± 0.9            | 1.8 ± 0.9            | 0.106        |
| TC (mmol/L)                           | 6.5 ± 0.6            | 6.5 ± 0.6            | 0.699        |
| HDL-C (mmol/L)                        | 1.4 ± 0.3            | 2.0 ± 0.5            | <0.001       |
| LDL-C (mmol/L)                        | 4.2 ± 0.6            | 3.7 ± 0.7            | <0.001       |
| Baseline CK (μmol/L)                  | 88.9 ± 37.2          | 113.6 ± 49.0         | <0.001       |
| CK elevation (4 weeks)                | 7.5 ± 40.5           | 35.9 ± 76.8          | <0.001       |
| CK elevation (8 weeks)                | 9.5 ± 40.6           | 85.9 ± 115.0         | <0.001       |
|                                       | N (%)                | N (%)                |              |
| <b>Gender</b>                         |                      |                      |              |
| Male                                  | 28 (14.4)            | 161 (41.1)           | <0.001       |
| Female                                | 167 (85.6)           | 231 (58.9)           |              |
| <b>Education</b>                      |                      |                      |              |
| High school or lower                  | 103 (52.8)           | 374 (95.4)           | <0.001       |
| College or higher                     | 92 (47.2)            | 18 (4.6)             |              |
| <b>Occupation</b>                     |                      |                      |              |
| Farmer                                | 1 (0.5)              | 256 (65.3)           | <0.001       |
| Non-farmer                            | 194 (99.5)           | 136 (34.7)           |              |
| <b>Cigarette Smoking</b>              |                      |                      |              |
| No                                    | 169 (86.7)           | 277 (70.7)           | <0.001       |
| Yes                                   | 26 (13.3)            | 115 (29.3)           |              |
| <b>Alcohol drinking</b>               |                      |                      |              |
| No                                    | 170 (87.2)           | 289 (73.7)           | <0.001       |
| Yes                                   | 25 (12.8)            | 103 (26.3)           |              |
| <b>Work intensity</b>                 |                      |                      |              |
| Light                                 | 165 (84.6)           | 127 (32.4)           | <0.001       |
| Moderate                              | 25 (12.8)            | 179 (45.7)           |              |
| Heavy                                 | 5 (2.6)              | 86 (21.9)            |              |

\*t-tests and Pearson's  $\chi^2$  tests were applied to continuous and categorical variables, respectively.

Abbreviations: SBP, systolic blood pressure; DBP, diastolic blood pressure; BMI, body mass index; WC, waist circumference; TG, triglycerides; TC, total cholesterol; HDL-C, high-density lipoprotein cholesterol; LDL-C, low-density lipoprotein cholesterol; CK, Creatine Kinase.

<sup>a</sup>BMI = weight/height<sup>2</sup>.

Bold values denoted significant results.

*G2548A* nor the *LEPR Q223R* polymorphism had an effect on baseline CK in the Dongzhi or Beijing regions individually. Consistently, there was no effect modification

by region in the associations of the *LEP G2548A* and *LEPR Q223R* polymorphisms with baseline CK levels, as shown in Supplementary Table 2.

**Table 2: Association between LEP G2548A and LEPR Q223R polymorphisms and baseline CK levels stratified by region**

| Variable           | Region         | LEP   | LEPR  | N   | Mean ± SD      | Unadjusted |       |         | Adjusted |       |         |
|--------------------|----------------|-------|-------|-----|----------------|------------|-------|---------|----------|-------|---------|
|                    |                |       |       |     |                | beta       | se    | P value | beta     | se    | P value |
| <b>Baseline CK</b> | <b>Dongzhi</b> | AA    |       | 202 | 116.09 ± 51.62 | Ref.       |       |         | Ref.     | .     | .       |
|                    |                | GA    |       | 161 | 109.70 ± 43.67 | -6.40      | 5.16  | 0.215   | -5.08    | 4.88  | 0.298   |
|                    |                | GG    |       | 29  | 117.31 ± 58.37 | 1.22       | 9.70  | 0.900   | -4.33    | 9.38  | 0.644   |
|                    |                | GA+GG |       | 190 | 110.86 ± 46.12 | -5.24      | 4.94  | 0.289   | -4.97    | 4.67  | 0.287   |
|                    |                |       | RR    | 317 | 113.25 ± 48.58 | Ref.       |       |         | Ref.     | .     | .       |
|                    |                |       | RQ    | 69  | 115.23 ± 52.12 | 1.99       | 6.51  | 0.760   | -9.87    | 5.77  | 0.087   |
|                    |                |       | QQ    | 6   | 110.67 ± 43.91 | -2.58      | 20.18 | 0.898   | 17.28    | 36.95 | 0.640   |
|                    |                |       | RQ+QQ | 75  | 114.87 ± 51.27 | 1.62       | 6.29  | 0.796   | -3.62    | 6.00  | 0.546   |
| <b>Baseline CK</b> | <b>Beijing</b> | AA    |       | 109 | 91.80 ± 37.97  | Ref.       |       |         | Ref.     | .     | .       |
|                    |                | GA    |       | 79  | 85.98 ± 36.61  | -5.82      | 5.46  | 0.286   | -6.13    | 5.42  | 0.258   |
|                    |                | GG    |       | 7   | 76.00 ± 30.84  | -15.80     | 14.40 | 0.272   | -12.71   | 14.21 | 0.370   |
|                    |                | GA+GG |       | 86  | 85.17 ± 36.12  | -6.63      | 5.33  | 0.213   | -6.69    | 5.28  | 0.205   |
|                    |                |       | RR    | 136 | 91.72 ± 36.68  | Ref.       |       |         | Ref.     | .     | .       |
|                    |                |       | RQ    | 58  | 81.86 ± 38.10  | -4.31      | 6.23  | 0.488   | -9.14    | 5.69  | 0.108   |
|                    |                |       | QQ    | 1   | 109.00 ± 0.0   | 3.87       | 19.22 | 0.840   | 33.65    | 36.98 | 0.362   |
|                    |                |       | RQ+QQ | 59  | 82.32 ± 37.93  | -9.41      | 5.75  | 0.101   | -8.50    | 5.69  | 0.134   |

Adjusted for: age, sex, BMI, cigarette smoking, and alcohol drinking.  
 Bold values denoted statistically significant results.

### Association of LEP G2548A and LEPR Q223R polymorphisms with elevation of CK levels in response to simvastatin treatment

To further detect the effects of the *LEP G2548A* and *LEPR Q223R* polymorphisms on the elevation of CK levels in response to simvastatin treatment, we investigated the relationship between those genotypes and changes in CK levels after four and eight weeks of simvastatin treatment among patients with primary hyperlipidemia. The analysis results were shown in Table 3. In the Dongzhi region, both genotypes were associated with CK elevation after four weeks of treatment but only the *LEP G2548A* polymorphism was associated with it after eight weeks of treatment. Neither genotype was associated with CK elevation in the Beijing region at either time point. Consistently, testing the region variable as an interaction term in the models showed effect modification by region of the associations between genotype and CK elevation for *LEP G2548A* at both time points and for *LEPR Q223R* at four weeks (Supplementary Table 3).

### Association of LEP G2548A and LEPR Q223R polymorphisms with tertiles of CK elevation in response to simvastatin treatment

We classified all of the patients at each time point into three mutually exclusive clusters based on the tertiles of CK change within each region to evaluate associations between polymorphisms and CK change after treatment. We used binary genotypes as outcomes (justified by the

results of Table 3) and predicted them by tertiles of CK elevation using logistic regression. As shown in Tables 4 and 5, the results in these models were consistent with those in Table 3. Specifically, in the Dongzhi region, tertiles of CK elevation were significantly associated with the *LEP G2548A* polymorphism at both four and eight weeks and with the *LEPR Q223R* polymorphism at four weeks only. The directions of these associations were consistent with those found in Table 3. In the Beijing region, there were no statistically significant associations between the tertiles of CK elevation and binary genotypes at either time point. Our models testing effect modification by region in these associations (Supplementary Tables 4 and 5) might have been underpowered due to the need to include two interaction terms for the three levels of CK elevation. There were no statistically significant interaction terms in these models except marginal significance for an effect modification by region ( $p = 0.06$ ) for the first versus third tertiles of CK elevation and the *LEPR Q223R* polymorphism at four weeks.

## DISCUSSION

Our present study is the first to indicate that the *LEP G2548A* and *LEPR Q223R* polymorphisms are associated with increasing CK levels after simvastatin treatment and that these associations can potentially be modified by environmental factors. Specifically, in the Dongzhi region, *LEP G2548A* was associated with CK increase after four and eight weeks of treatment, and *LEPR Q223R* was associated with CK increase after four weeks of

**Table 3: Association between LEP G2548A and LEPR Q223R polymorphisms and the elevation of CK levels after 4 weeks and 8 weeks' simvastatin treatment stratified by region**

| Variable          | Region  | LEP     | LEPR          | N              | Mean ± SD       | Unadjusted    |                  |                  | Adjusted |                  |                  |       |
|-------------------|---------|---------|---------------|----------------|-----------------|---------------|------------------|------------------|----------|------------------|------------------|-------|
|                   |         |         |               |                |                 | beta          | se               | P value          | beta     | se               | P value          |       |
| <b>At 4 weeks</b> |         |         |               |                |                 |               |                  |                  |          |                  |                  |       |
| CK elevation      | Dongzhi | AA      |               | 202            | 46.96 ± 93.69   | Ref.          | .                | .                | Ref.     | .                | .                |       |
|                   |         | GA      |               | 161            | 22.14 ± 47.89   | -24.81        | 8.01             | <b>0.002</b>     | -24.15   | 7.90             | <b>0.002</b>     |       |
|                   |         | GG      |               | 29             | 34.72 ± 66.02   | -12.23        | 15.06            | 0.416            | -9.70    | 15.17            | 0.522            |       |
|                   |         | GA+GG   |               | 190            | 24.06 ± 51.07   | -22.89        | 7.67             | <b>0.003</b>     | -22.00   | 7.57             | <b>0.004</b>     |       |
|                   |         |         | RR            | 317            | 28.53 ± 57.12   | Ref.          | .                | .                | Ref.     | .                | .                |       |
|                   |         |         | RQ            | 69             | 68.61 ± 131.51  | 40.08         | 9.99             | <b>&lt;0.001</b> | 36.08    | 10.02            | <b>&lt;0.001</b> |       |
|                   |         |         | QQ            | 6              | 46.50 ± 43.92   | 17.97         | 30.99            | 0.562            | 22.45    | 30.91            | 0.467            |       |
|                   |         | RQ+QQ   | 75            | 66.84 ± 126.72 | 38.31           | 9.66          | <b>&lt;0.001</b> | 34.93            | 9.66     | <b>&lt;0.001</b> |                  |       |
|                   |         | Beijing | AA            |                | 109             | 7.21 ± 40.39  | Ref.             | .                | .        | Ref.             | .                |       |
|                   |         |         | GA            |                | 79              | 7.36 ± 41.23  | 0.15             | 5.96             | 0.980    | 0.47             | 6.00             | 0.937 |
|                   |         |         | GG            |                | 7               | 12.29 ± 37.99 | 5.08             | 15.73            | 0.746    | 4.54             | 15.73            | 0.773 |
|                   |         |         | GA+GG         |                | 86              | 7.76 ± 40.79  | 0.55             | 5.82             | 0.924    | 0.82             | 5.85             | 0.888 |
|                   |         |         | RR            | 136            | 9.09 ± 42.02    | Ref.          | .                | .                | Ref.     | .                | .                |       |
|                   |         |         | RQ            | 58             | 3.33 ± 36.91    | -5.76         | 6.31             | 0.361            | -6.12    | 6.32             | 0.332            |       |
|                   | QQ      |         | 1             | 23.00 ± 0.0    | 13.91           | 40.40         | 0.730            | 12.41            | 41.03    | 0.762            |                  |       |
|                   | RQ+QQ   | 59      | 3.66 ± 36.68  | -5.43          | 6.28            | 0.387         | -5.84            | 6.29             | 0.353    |                  |                  |       |
| <b>At 8 weeks</b> |         |         |               |                |                 |               |                  |                  |          |                  |                  |       |
| CK elevation      | Dongzhi | AA      |               | 202            | 109.66 ± 136.89 | Ref.          | .                | .                | Ref.     | .                | .                |       |
|                   |         | GA      |               | 161            | 59.20 ± 78.31   | -50.46        | 11.85            | <b>&lt;0.001</b> | -50.39   | 11.83            | <b>&lt;0.001</b> |       |
|                   |         | GG      |               | 29             | 67.86 ± 81.05   | -41.80        | 22.27            | 0.060            | -39.29   | 22.72            | 0.083            |       |
|                   |         | GA+GG   |               | 190            | 60.53 ± 78.58   | -49.13        | 11.34            | <b>&lt;0.001</b> | -48.73   | 11.32            | <b>&lt;0.001</b> |       |
|                   |         |         | RR            | 317            | 84.76 ± 107.91  | Ref.          | .                | .                | Ref.     | .                | .                |       |
|                   |         |         | RQ            | 69             | 89.35 ± 144.80  | 4.59          | 15.25            | 0.763            | 2.34     | 15.43            | 0.879            |       |
|                   |         |         | QQ            | 6              | 102.83 ± 111.03 | 18.07         | 47.31            | 0.702            | 25.93    | 47.60            | 0.585            |       |
|                   |         | RQ+QQ   | 75            | 90.43 ± 141.82 | 5.67            | 14.74         | 0.700            | 4.33             | 14.87    | 0.771            |                  |       |
|                   |         | Beijing | AA            |                | 109             | 9.20 ± 46.10  | Ref.             | .                | .        | Ref.             | .                |       |
|                   |         |         | GA            |                | 79              | 10.97 ± 33.49 | 1.77             | 5.97             | 0.766    | 2.61             | 6.01             | 0.664 |
|                   |         |         | GG            |                | 7               | -2.43 ± 16.00 | -11.63           | 15.76            | 0.460    | -11.49           | 15.74            | 0.465 |
|                   |         |         | GA+GG         |                | 86              | 9.88 ± 32.57  | 0.68             | 5.84             | 0.907    | 1.41             | 5.86             | 0.809 |
|                   |         |         | RR            | 136            | 9.19 ± 41.11    | Ref.          | .                | .                | Ref.     | .                | .                |       |
|                   |         |         | RQ            | 58             | 9.97 ± 40.01    | 0.78          | 6.35             | 0.901            | 0.78     | 6.35             | 0.901            |       |
|                   | QQ      |         | 1             | 25.00 ± 0.0    | 15.81           | 40.62         | 0.697            | 23.82            | 41.22    | 0.563            |                  |       |
|                   | RQ+QQ   | 59      | 10.23 ± 39.71 | 1.04           | 6.31            | 0.869         | 1.13             | 6.32             | 0.858    |                  |                  |       |

Adjusted for: age, sex, BMI, cigarette smoking, alcohol drinking, and baseline CK levels.

Bold values denoted statistically significant results.

treatment, though not after eight weeks. Neither genotype was associated with CK increase in the Beijing region. Furthermore, neither the *LEP G2548A* nor the *LEPR Q223R* genotype was associated with baseline CK levels in either region.

The heritability of CK levels has been estimated to be as high as 38% [24], while recent data places it at 19.33% [25]. A published genome-wide association study (GWAS) of 3,232,779 imputed variants in 3,412 statin users identified two missense variants that effected serum

CK levels; one in CKM (rs11559024) and one in LILRB5 (rs12975366) [26]. Further work identified a variant in CD163 (rs7136716) to also be associated with serum CK levels [27]. To further search for sequence variants influencing serum CK levels, an Icelandic study of 28.3 million sequence variants identified through whole-genome sequencing of 2,636 Icelanders was imputed into 63,159 people with CK measurements [25]. This work found thirteen variants related to serum CK levels, of which eight variants were confirmed in the genes encoding

**Table 4: Associations of LEP G2548A genotype by tertiles of CK increase after simvastatin for 4 and 8 weeks stratified by region**

| Region  | Tertile       | CK increase<br>Mean ± SD | Genotype |     |         | Unadjusted       |              | Adjusted |                  |              |
|---------|---------------|--------------------------|----------|-----|---------|------------------|--------------|----------|------------------|--------------|
|         |               |                          | GA+GG    | AA  | OR      | 95%_CI           | P value      | OR       | 95%_CI           | P value      |
| Dongzhi | At 4 weeks    |                          |          |     |         |                  |              |          |                  |              |
|         | 1st           | -17.2 ± 25.3             | 78       | 54  | 1.0     | .                |              | 1.0      | .                |              |
|         | 2nd           | 21.7 ± 9.9               | 59       | 69  | 0.6     | 0.4–1.0          | <b>0.036</b> | 0.6      | 0.3–0.9          | <b>0.027</b> |
|         | 3rd           | 102.6 ± 96.7             | 53       | 79  | 0.5     | 0.3–0.8          | <b>0.002</b> | 0.5      | 0.3–0.7          | <b>0.002</b> |
|         | At 8 weeks    |                          |          |     |         |                  |              |          |                  |              |
|         | 1st           | 2.3 ± 22.4               | 80       | 49  | 1.0     | .                |              | 1.0      | .                |              |
| 2nd     | 54.9 ± 15.9   | 61                       | 71       | 0.5 | 0.3–0.9 | <b>0.011</b>     | 0.5          | 0.3–0.9  | <b>0.013</b>     |              |
| 3rd     | 199.2 ± 134.7 | 49                       | 82       | 0.4 | 0.2–0.6 | <b>&lt;0.001</b> | 0.4          | 0.2–0.6  | <b>&lt;0.001</b> |              |
| Beijing | At 4 weeks    |                          |          |     |         |                  |              |          |                  |              |
|         | 1st           | -23.4 ± 17.5             | 29       | 38  | 1.0     | .                |              | 1.0      | .                |              |
|         | 2nd           | 2.2 ± 4.3                | 30       | 34  | 1.2     | 0.6–2.3          | 0.680        | 1.0      | 0.4–2.1          | 0.901        |
|         | 3rd           | 45.0 ± 47.1              | 27       | 37  | 1.0     | 0.5–1.9          | 0.899        | 0.8      | 0.4–1.7          | 0.534        |
|         | At 8 weeks    |                          |          |     |         |                  |              |          |                  |              |
|         | 1st           | -24.1 ± 23.5             | 26       | 38  | 1.0     | .                |              | 1.0      | .                |              |
| 2nd     | 4.8 ± 5.6     | 30                       | 37       | 1.2 | 0.6–2.4 | 0.631            | 1.2          | 0.6–2.8  | 0.607            |              |
| 3rd     | 48.0 ± 42.4   | 30                       | 34       | 1.3 | 0.6–2.6 | 0.476            | 1.1          | 0.5–2.4  | 0.853            |              |

Adjusted for: age, sex, BMI, cigarette smoking, alcohol drinking, and baseline CK levels.

Bold values denoted statistically significant results.

the enzymes being measured (CKM, LILRB5 and CD163). However, our current data did not support the idea that the *LEP G2548A* and *LEPR Q223R* genotypes were associated with baseline CK levels.

Based on knowledge of the pharmacokinetic and pharmacodynamic processes involved in the effects of statins, it is evident that genetic polymorphisms may be useful in predicting adverse drug reactions to statin therapy. Several transporters involved in statin disposition are known to cause statin-induced myotoxicity. The main transporters are organic anion transporting polypeptide 1B1 coded by the *SLCO1B1* gene, ATP-binding cassette (ABC) transporters subfamily B member 1 coded by the *ABCB1* gene, and ABC transporters subfamily G member 2 coded by the *ABCG2* gene. A recent pharmacogenetic study showed that statin-induced CK elevation is associated with polymorphisms in both the *SLCO1B1* and *ABCB1* genes [28]. In detail, the C allele in the T521C SNP of the *SLCO1B1* gene and the T allele in the C1236T SNP of the *ABCB1* gene exhibit elevated serum CK levels [29] and a higher risk of simvastatin- and rosuvastatin-induced myopathy [30–32]. In contrast, the G allele in the A388G SNP of the *SLCO1B1* gene results in a lower risk of statin-induced myopathy [32–34].

Leptin is the most significant energy- and appetite-regulating peptide. It is produced predominantly in the adipose tissue and is proportionally related to adiposity. Thus, serum leptin concentrations can be used to determine the amount of energy reserves stored in adipose

tissue [35]. Studies indicated that plasma leptin levels are higher in obese patients [36], and these levels dropped during fasting [37]. Additionally, leptin is a key regulator of feeding behavior and has been tied to hypertension, abdominal obesity, dyslipidemia and other metabolic risk factors in certain populations [38–41]. Numerous studies have reported that the *LEP G2548A* [42] and *LEPR Q223R* [16] polymorphisms were associated with lipid profiles, in which leptin may contribute to the cholesterol metabolic process [43]. Leptin down-regulates the hepatic activity of HMG-CoA reductase and up-regulates activity of both sterol 27-hydroxylase and cholesterol 7 $\alpha$ -hydroxylase, which leads to decreased plasma very-low density lipoprotein cholesterol (VLDL-C) concentrations [44]. Moreover, leptin is also known to phosphorylate and activate AMPK via central and peripheral mechanisms. AMPK in peripheral tissues, including liver, muscle and adipose tissue, directly increases energy expenditure, and AMPK in the central nervous system indirectly alters peripheral energy expenditure [45]. AMPK is a protein kinase which phosphorylates and inactivates HMG-CoA reductase, so it helps inhibit the synthesis of cholesterol and triglycerides [46]. Therefore, leptin can competitively act with statins on inhibiting the HMG-CoA reductase, reducing the cholesterol synthesis and increasing serum CK levels.

CK levels vary largely in myopathic individuals and reflect muscle injury [47]. Muscular injury is characterized by impaired striated muscle cell integrity and the release

**Table 5: Associations of LEPRQ223R genotype by tertiles of CK increase after simvastatin for 4 and 8 weeks stratified by region**

| Region  | Tertile       | CK increase<br>Mean ± SD | Genotype |      |           | Unadjusted |              | Adjusted  |           |              |  |
|---------|---------------|--------------------------|----------|------|-----------|------------|--------------|-----------|-----------|--------------|--|
|         |               |                          | RQ+QQ    | RR   | OR        | 95%_CI     | P value      | OR        | 95%_CI    | P value      |  |
| Dongzhi | At 4 weeks    |                          |          |      |           |            |              |           |           |              |  |
|         | 1st           | -17.2 ± 25.3             | 17       | 115  | 1.0       |            |              | 1.0       |           |              |  |
|         | 2nd           | 21.7 ± 9.9               | 24       | 104  | 1.56      | 0.79–3.07  | 0.196        | 1.42      | 0.68–2.95 | 0.349        |  |
|         | 3rd           | 102.6 ± 96.7             | 34       | 98   | 2.35      | 1.24–4.46  | <b>0.009</b> | 2.19      | 1.13–4.26 | <b>0.020</b> |  |
|         | At 8 weeks    |                          |          |      |           |            |              |           |           |              |  |
|         | 1st           | 2.3 ± 22.4               | 25       | 104  | 1.0       |            |              | 1.0       |           |              |  |
| 2nd     | 54.9 ± 15.9   | 22                       | 110      | 0.83 | 0.44–1.57 | 0.568      | 0.72         | 0.37–1.39 | 0.321     |              |  |
| 3rd     | 199.2 ± 134.7 | 28                       | 103      | 1.13 | 0.62–2.07 | 0.689      | 1.16         | 0.62–2.15 | 0.646     |              |  |
| Beijing | At 4 weeks    |                          |          |      |           |            |              |           |           |              |  |
|         | 1st           | -23.4 ± 17.5             | 23       | 44   | 1.0       |            |              | 1.0       |           |              |  |
|         | 2nd           | 2.2 ± 4.3                | 19       | 45   | 0.81      | 0.39–1.69  | 0.569        | 0.59      | 0.25–1.38 | 0.224        |  |
|         | 3rd           | 45.0 ± 47.1              | 17       | 47   | 0.69      | 0.33–1.46  | 0.335        | 0.57      | 0.26–1.27 | 0.168        |  |
|         | At 8 weeks    |                          |          |      |           |            |              |           |           |              |  |
|         | 1st           | -24.1 ± 23.5             | 17       | 47   | 1.0       |            |              | 1.0       |           |              |  |
| 2nd     | 4.8 ± 5.6     | 18                       | 49       | 1.02 | 0.47–2.20 | 0.968      | 0.98         | 0.40–2.40 | 0.967     |              |  |
| 3rd     | 48.0 ± 42.4   | 24                       | 40       | 1.66 | 0.78–3.51 | 0.186      | 1.62         | 0.71–3.68 | 0.251     |              |  |

Adjusted for: age, sex, BMI, cigarette smoking, alcohol drinking, and baseline CK levels.

Bold values denoted statistically significant results.

of intracellular enzymes into the circulation in patients with statin therapy [48], especially CK and myoglobin [49]. Meyer zuSchwabedissen *et al.* [50] reported that patients who received fluvastatin and telmisartan treatment subsequently suffered myalgia along with elevated CK levels. Evidence has shown that both CK and AMPK systems coordinate in maintaining energy homeostasis [11], and leptin can phosphorylate and activate AMPK [15]. Thus, we speculate that leptin may contribute to regulating CK levels. Our results showed that, after four consecutive weeks of simvastatin treatment, patients in the Dongzhi region carrying the *AA* genotype of *LEP G2548A* had a significantly higher increase in CK levels than those with the *GA* ( $P = 0.002$ ) or *GA+GG* genotypes ( $P = 0.004$ ). Patients carrying the *RQ+QQ* genotype of the *LEPR Q223R* gene had a significantly higher increase in CK levels than those with *RR* ( $P < 0.001$ ). After eight weeks of simvastatin treatment, patients carrying the *AA* genotype of *LEP G2548A* had a significantly higher increase in CK levels than those with the *GA* ( $P < 0.001$ ) or *GA+GG* genotypes ( $P < 0.001$ ). However, there was not a significant relationship between *LEPR Q223R* and CK elevation after eight weeks of treatment in the Dongzhi patients. Furthermore, no significant differences in the elevation of CK levels were observed among different *LEPR Q223R* genotypes after both four and eight weeks of simvastatin treatment in Beijing regional patients.

CK elevation in response to simvastatin is a complex multifactorial trait. Generally, it is attributed to

an interaction between a patient's genetic background and various environmental factors. In the present study, our populations were sampled randomly within the two regions Dongzhi and Beijing. Dongzhi and Beijing are located in the south and north of China, respectively, and residents of the two places have their own distinctive customs and cultures including geographical location, intra-area marriages, dietary habits and lifestyles. Contrary to the Dongzhi region, the Beijing region showed higher percentages of male, educated and working individuals, but lower prevalence of cigarette smoking, alcohol drinking and work intensity. The reason for these discrepancies between the two regions may be the dramatically distinct cultural and economic environments. Beijing is the national capital city and in northern China, but Dongzhi is a rural area in southern China. Our data showed that the interaction term of Beijing region × *LEP (GA+GG)* genotypes was marginally significant for CK elevation ( $P = 0.057$ ) at the fourth week and strongly significant for CK elevation ( $P = 0.002$ ) at the eighth week. Supplementary Table 3 also supported that the *LEP* genotype was associated with CK increase in Dongzhi after four and eight weeks of treatment, though not in Beijing. These differences between Dongzhi and Beijing, shown in the effect modification by region, were statistically significant. The *LEPR* genotype was associated with CK increase in Dongzhi after 4 weeks of treatment, but not in Beijing. However, after 8 weeks of treatment, the *LEPR* genotype no longer had any association with CK increase

in either region. The difference in the association between Dongzhi and Beijing at four weeks was statistically significant.

As mentioned above, there are many differences between Beijing and Dongzhi. An interesting possibility raised by this paper is that, in addition to genes, gene-environment interactions can also affect the side effects of simvastatin. This opens the door to the possibility that side effects could be limited not only by individualized medicine based on genotype, but also by lifestyle changes recommended according to genotype. In other words, correcting certain lifestyle factors could reduce the adverse effects of genotype on the likelihood of side effects from pharmaceuticals. Similar to our finding, unfavorable lifestyle factors and genetic variants were determined to be of the same importance in contributing to increased risk of coronary artery disease [23]. Among participants at high genetic risk, a favorable lifestyle was associated with a nearly 50% lower relative risk of coronary artery disease than was an unfavorable lifestyle. The lifestyle factors that are interacting with genotype to affect CK increase in this study are unknown currently because we used region as the proxy for lifestyle. Our region variable is associated with many different lifestyle factors. The next step in our analysis will be to look at all of the lifestyle-related variables that have different distributions in Beijing compared to Dongzhi and investigate which of these variables modify the associations of the genotypes with CK increase. The variables included in this study that have different prevalence or averages in Beijing versus Dongzhi were age, gender, BMI, WC, SBP, fasting glucose, HDL, LDL, CK, education, occupation, cigarette smoking, alcohol consumption and work intensity. We will investigate whether these are effect modifiers in the association between genotypes and CK increase, regardless of region, in a future analysis.

We excluded 147 people from Beijing because their genotype data was unreliable due to degradation of one batch of samples in storage. The measured characteristics of participants from Beijing with genotype data versus those without genotype data are mostly similar. Among the seventeen variables included in Supplementary Table 1, only three show significant differences between these two groups. Furthermore, for these three variables, the magnitudes of differences between groups are not especially large, although still statistically significant. Beyond this, even though these three variables significantly differ between the two groups, this does not indicate that they are significant effect modifiers of the associations between genotypes and CK increase, a condition that would be necessary for our Beijing results to suffer selection bias due to this loss of genotype data. Nonetheless, the results we found in our Beijing participants should be read with this loss of data in mind and awareness that we cannot completely discount selection bias due to this loss.

Two limitations of our study should be mentioned. As is well known, leptin plays an important role in the relationship of *LEP G2548A* and *LEPR Q223R* with obesity, diabetes mellitus, dyslipidemia and CK. We did not measure leptin levels, so we could not determine whether the *LEP* and *LEPR* polymorphisms were associated with leptin levels or whether the *LEP* and *LEPR* polymorphisms and leptin levels interacted in their associations with the outcomes in this study. Limited evidence showed that neither *LEP G2548A* nor *LEPR Q223R* polymorphisms were significantly associated with plasma leptin levels in Chinese populations [51, 52]. Therefore, we are considering to measure serum leptin, adipokine and soluble leptin receptor concentrations in our ongoing large scale cardiovascular cohort project. Additionally, all patients received simvastatin treatment orally at the low dosage of 20 mg/d for eight consecutive weeks. We cannot dichotomize the CK concentration as CK elevation or no CK elevation based on the common criteria of 3×UNL CK or higher, as only a few subjects met this criterion; three and seventeen participants met it for the response to CK elevation after four and eight weeks of treatment, respectively. Also, we had to exclude some patients in the Beijing area due to unreliable genotype data. Although the characteristics of included and excluded patients from Beijing were similar and so the likelihood of selection bias was reduced, a limitation was that we had less power to detect statistically significant associations in the Beijing region compared to Dongzhi.

In conclusion, our major findings demonstrated that the *LEP G2548A* (after four and eight weeks of treatment) and *LEPR Q223R* polymorphisms (after four weeks treatment) were associated with simvastatin-induced CK increase in the Dongzhi region, though not in Beijing. This opens the possibility that lifestyle interventions could reduce or eliminate some of the adverse side effects of statin therapy that are associated with particular genotypes.

## MATERIALS AND METHODS

### Study population

In total, 734 Chinese subjects with primary hyperlipidemia were enrolled from Beijing and Dongzhi, Anhui Province. 587 patients with complete information on genotypes and other parameters were included in this study. We screened eligible patients with hyperlipidemia through medical history, physical examination and clinical laboratory evaluation, including the lipid profile. No participant demonstrated symptomatic ischemic heart disease or any other vascular diseases. Patients were required to stop taking any lipid-, hypertension- or glucose-lowering drugs at least seven days prior to the study. All participants gave informed consent, and the study protocol was approved by the ethics committee of the Institute of Biomedicine at Anhui Medical University.



Participants who met the following criteria of fasting serum lipid levels were deemed as having primary hyperlipidemia: TC 5.72–8.32 mmol/L or LDL-C 3.64–6.50 mmol/L and TG at least 1.70 mmol/L [53, 54]. To avoid any potential side effects from our treatment program, patients with any of the following characteristics were excluded: (1) impaired hepatic function (aminotransferase levels greater than two times the norm coupled with a history of chronic liver disease, such as cirrhosis or alcohol abuse), (2) impaired renal function (serum creatine levels greater than 1.8 mg/dL or a history of chronic renal disease, such as glomerulonephritis, chronic pyelonephritis, obstructive renal disease, or proteinuria), (3) raised thyroid-stimulating hormone (TSH) levels (greater than 5.0  $\mu$ U/L), and (4) any other medical conditions that might preclude successful completion.

### Simvastatin treatment

Following a washout period of seven to ten days, all patients began oral treatment of a fixed 20 mg/d dosage of simvastatin for eight consecutive weeks. Patients administered the drugs themselves nightly between 8 p.m. and 10 p.m. During the study period, subjects visited our clinical center biweekly to obtain their drugs for the next two weeks and to report any adverse effects. Patients whose laboratory parameters were affected by the treatment were excluded during the study. At baseline, four weeks, and eight weeks, blood samples were drawn following a fourteen hour overnight fast in order to determine serum lipids levels and other biochemical parameters, such as TG, TC, HDL-C, LDL-C, fasting glucose and CK.

### Laboratory determinations

After a fourteen hour overnight fast, venous blood samples were taken the following morning between 8 a.m. and 10 a.m. and stored in ethylenediaminetetraacetic acid (EDTA) tubes. The samples were then centrifuged at 2500 r/min for ten min in order to obtain the serum. In our analytical center, automated biochemical analysis was used for the laboratory determinations. Levels of TG, TC, HDL-C, LDL-C and CK were calculated with enzymatic colorimetric assays (Roche Diagnostics, Mannheim, Germany). Fasting glucose levels were determined using the glucose oxidase method. The intra-assay and inter-assay coefficients of variation were less than 5% for all assays performed.

### Genotyping of *LEP* G2548A and *LEPR* Q223R

DNA was extracted from EDTA-treated whole blood and stored at  $-20^{\circ}\text{C}$ . Genotyping of the *LEP* G2548A (rs7799039) and *LEPR* Q223R (rs1137101) genes was

carried out using the polymerase chain reaction-restriction fragment length polymorphism (PCR-RFLP) assay. For the *LEP* G2548A gene, the primer-pairs for PCR amplification were forward 5'-TTTCCTGTAATTTCCCGTGAG-3' and reverse 5'-AAAGCAAAGACAGGCATAAAAA-3'. For the *LEPR* Q223R gene, they were forward 5'-ACCTCTGGTTCCCCAAAAAG-3' and reverse 5'-TCATCATTTTAGTGCATAACTTACCC-3'. PCR amplification was carried out in 25  $\mu$ L PCR mixture in a PCR Amplifier (Long Gene). For the *LEP* G2548A gene, the process was as follows: an initial denaturation at  $95^{\circ}\text{C}$  for 60 s, followed by 35 cycles of denaturation at  $95^{\circ}\text{C}$  for 30 s, annealing at  $56^{\circ}\text{C}$  for 45 s, and extension at  $72^{\circ}\text{C}$  for 30 s, with a final extension at  $72^{\circ}\text{C}$  for 7 min. For the *LEPR* Q223R gene, the process was as follows: an initial denaturation at  $94^{\circ}\text{C}$  for 2 min, followed by 35 cycles of denaturation at  $94^{\circ}\text{C}$  for 30 s, annealing at  $56^{\circ}\text{C}$  for 45 s, and extension at  $72^{\circ}\text{C}$  for 45 s, then a final extension at  $72^{\circ}\text{C}$  for 6 min. After PCR amplification, 15  $\mu$ L was digested with restriction enzymes: HhaI [55] for *LEP* at  $37^{\circ}\text{C}$  for 4 h, and MspI [55] for *LEPR* at  $37^{\circ}\text{C}$  for 5 h. The digestion products were then separated on 3% agarose gels stained with ethidium bromide. The 242bp fragment was divided into 242bp, 181bp and 61bp; the 212bp fragment was divided into 212bp, 151bp and 61bp. All sample sets genotyped for each SNP in our present study had overall call rates of 95% after excluding samples that consistently failed. Then we selected around 10% samples for repeated genotyping. We had 100% concordance of repeated samples in these quality control tests..

### Statistical analysis

Continuous data were presented as mean  $\pm$  standard deviation (SD), and categorical data were presented as proportions. Comparisons between groups were performed using chi-square tests for categorical variables and Student's *t* test for continuous variables. Multiple linear/logistic regression models were fit to estimate the associations between *LEP* and *LEPR* polymorphisms and CK levels at baseline and after simvastatin treatment. All analyses conducted were stratified by region. The regression coefficients, listed as beta values in our tables, were estimated using the least-squares method and can be interpreted as the mean difference in CK elevation between a genotype group and the reference group. We also examined interactions on the multiplicative scale between the single-nucleotide polymorphisms and the different environmental regions in association with CK elevation. The SAS 8.0 software package (SAS Institute, Cary, NC) and IBM SPSS software package (version 19.0 for windows; IBM Inc. Armonk, NY, USA) were used for statistical analysis. *P*-values less than 0.05 were considered to be significant.

## Author contributions

shanqun Jiang, Scott A. Venners, Kang Li, Justin Weinstock, Yanfeng Zou wrote the article; Shanqun Jiang, Scott A. Venners, Yi-Hsiang Hsu, Faming Pan and Xiping Xu designed the research; Shanqun Jiang, Scott A. Venners, Kang Li, Yi-Hsiang Hsu, Justin Weinstock, Faming Pan, and Xiping Xu performed the research; Shanqun Jiang and Scott A. Venners analyzed the data.

## ACKNOWLEDGMENTS

This study was supported by the National Key Research and Development Program (Grant No. 2016YFC0903100), the National Natural Science Foundation of China (No. 81373484, 81141116 and 30700454), the Academic Top Talents Funding of University (No. gxbjZD2016008) and the Academic Leader and Reserve Candidate of Anhui Province (No. 05010543). We gratefully acknowledge the assistance and cooperation of the faculty and staff of the Anhui Medical University and thank all of the participants in our study. This study was conducted in accordance with the current regulations of the People's Republic of China. None of the authors claim any conflicts of interest.

## CONFLICTS OF INTEREST

The authors declare no competing financial interests.

## REFERENCES

1. Baigent C, Keech A, Kearney PM, Blackwell L, Buck G, Pollicino C, Kirby A, Sourjina T, Peto R, Collins R, Simes R, and Cholesterol Treatment Trialists' (CTT) Collaborators. Efficacy and safety of cholesterol-lowering treatment: prospective meta-analysis of data from 90,056 participants in 14 randomised trials of statins. *Lancet*. 2005; 366:1267–1278.
2. Assmann G, Kannenberg F, Ramey DR, Musliner TA, Gutkin SW, Veltri EP. Effects of ezetimibe, simvastatin, atorvastatin, and ezetimibe-statin therapies on non-cholesterol sterols in patients with primary hypercholesterolemia. *Curr Med Res Opin*. 2008; 24:249–259.
3. Vaughan CJ, Gotto AM Jr. Update on statins: 2003. *Circulation*. 2004; 110:886–892.
4. Kotseva K, Wood D, De Backer G, De Bacquer D, Pyörälä K, Keil U; EUROASPIRE Study Group. EUROASPIRE III: a survey on the lifestyle, risk factors and use of cardioprotective drug therapies in coronary patients from 22 European countries. *Eur J Cardiovasc Prev Rehabil*. 2009; 16:121–137.
5. Cardinal H, Monfared AA, Dorais M, Leloirier J. The concept of the 'percent wasted patients' in preventive health strategies. *Pharmacoepidemiol Drug Saf*. 2006; 15:57–61.
6. Bruckert E, Hayem G, Dejager S, Yau C, Begaud B. Mild to moderate muscular symptoms with high-dosage statin therapy in hyperlipidemic patients—the PRIMO study. *Cardiovasc Drugs Ther*. 2005; 19:403–414.
7. Baker SK, Samjoo IA. A neuromuscular approach to statin-related myotoxicity. *Can J Neurol Sci*. 2008; 35:8–21.
8. Vladutiu GD, Simmons Z, Isackson PJ, Tarnopolsky M, Peltier WL, Barboi AC, Sripathi N, Wortmann RL, Phillips PS. Genetic risk factors associated with lipid-lowering drug-induced myopathies. *Muscle Nerve*. 2006; 34:153–62.
9. Thompson PD, Clarkson P, Karas RH. Statin-associated myopathy. *Jama*. 2003; 289:1681–1690.
10. Wallimann T, Wyss M, Brdiczka D, Nicolay K, Eppenberger HM. Intracellular compartmentation, structure and function of creatine kinase isoenzymes in tissues with high and fluctuating energy demands: the 'phosphocreatine circuit' for cellular energy homeostasis. *Biochem J*. 1992; 281:21–40.
11. Neumann D, Schlattner U, Wallimann T. A molecular approach to the concerted action of kinases involved in energy homeostasis. *Biochem Soc Trans*. 2003; 31:169–174.
12. Ramírez Ríos S, Lamarche F, Cottet-Rousselle C, Klaus A, Tuerk R, Thali R, Auchli Y, Brunisholz R, Neumann D, Barret L, Tokarska-Schlattner M, Schlattner U. Regulation of brain-type creatine kinase by AMP-activated protein kinase: interaction, phosphorylation and ER localization. *Biochim Biophys Acta*. 2014; 1837:1271–1283.
13. Ponticos M, Lu QL, Morgan JE, Hardie DG, Partridge TA, Carling D. Dual regulation of the AMP-activated protein kinase provides a novel mechanism for the control of creatine kinase in skeletal muscle. *EMBO J*. 1998; 17:1688–99.
14. Towler MC, Hardie DG. AMP-activated protein kinase in metabolic control and insulin signaling. *Circ Res*. 2007; 100:328–341.
15. Minokoshi Y, Kim YB, Peroni OD, Fryer LG, Müller C, Carling D, Kahn BB. Leptin stimulates fatty-acid oxidation by activating AMP-activated protein kinase. *Nature*. 2002; 415:339–343.
16. Becer E, Mehmetcik G, Bareke H, Serakinci N. Association of leptin receptor gene Q223R polymorphism on lipid profiles in comparison study between obese and non-obese subjects. *Gene*. 2013; 529:16–20.
17. Mammès O, Betoulle D, Aubert R, Herbeth B, Siest G, Fumeron F. Association of the G-2548A polymorphism in the 5' region of the LEP gene with overweight. *Ann Hum Genet*. 2000; 64:391–394.
18. Le Stunff C, Le Bihan C, Schork NJ, Bougneres P. A common promoter variant of the leptin gene is associated with changes in the relationship between serum leptin and fat mass in obese girls. *Diabetes*. 2000; 49:2196–2200.
19. Hoffstedt J, Eriksson P, Mottagui-Tabar S, Arner P. A polymorphism in the leptin promoter region (-2548 G/A) influences gene expression and adipose tissue secretion of leptin. *Horm Metab Res*. 2002; 34:355–359.
20. Liu Y, Chen SQ, Jing ZH, Hou X, Chen Y, Song XJ, Lv WS, Wang R, Wang YG. Association of LEPR Gln223Arg

- polymorphism with T2DM: A meta-analysis. *Diabetes Res Clin Pract.* 2015; 109:e21–26.
21. Stampfer MJ, Hu FB, Manson JE, Rimm EB, Willett WC. Primary prevention of coronary heart disease in women through diet and lifestyle. *N Engl J Med.* 2000; 343:16–22.
  22. Chomistek AK, Chiuve SE, Eliassen AH, Mukamal KJ, Willett WC, Rimm EB. Healthy lifestyle in the primordial prevention of cardiovascular disease among young women. *J Am Coll Cardiol.* 2015; 65:43–51.
  23. Khera AV, Emdin CA, Drake I, Natarajan P, Bick AG, Cook NR, Chasman DI, Baber U, Mehran R, Rader DJ, Fuster V, Boerwinkle E, Melander O, et al. Genetic Risk, Adherence to a Healthy Lifestyle, and Coronary Disease. *N Engl J Med.* 2016; 375:2349–2358.
  24. Rapaport D, Colletto GM, Zatz M, Opitz JM, Reynolds JF. Genetic and environmental components of serum creatine kinase (CK) and pyruvate kinase (PK) in normal twins: implication for genetic risks estimates in Duchenne muscular dystrophy carriers. *Am J Med Genet.* 1988; 31:291–298.
  25. Kristjansson RP, Oddsson A, Helgason H, Sveinbjornsson G, Arnadottir GA, Jensson BO, Jonasdottir A, Jonasdottir A, Bragi Walters G, Sulem G, Oskarsdottir A, Benonisdottir S, Davidsson OB, et al. Common and rare variants associating with serum levels of creatine kinase and lactate dehydrogenase. *Nat Commun.* 2016;7:10572.
  26. Dubé MP, Zetler R, Barhadi A, Brown AM, Mongrain I, Normand V, Laplante N, Asselin G, Zada YF, Provost S, Bergeron J, Kouz S, Dufour R, et al. CKM and LILRB5 are associated with serum levels of creatine kinase. *Circ Cardiovasc Genet.* 2014; 7:880–886.
  27. Kamatani Y, Matsuda K, Okada Y, Kubo M, Hosono N, Daigo Y, Nakamura Y, Kamatani N. Genome-wide association study of hematological and biochemical traits in a Japanese population. *Nat Genet.* 2010; 42:210–215.
  28. Ferrari M, Guasti L, Maresca A, Mirabile M, Contini S, Grandi AM, Marino F, Cosentino M. Association between statin-induced creatine kinase elevation and genetic polymorphisms in SLCO1B1, ABCB1 and ABCG2. *Eur J Clin Pharmacol.* 2014; 70:539–547.
  29. Scarpini F, Cappellone R, Auteri A, Puccetti L. Role of genetic factors in statins side-effects. *Cardiovasc Hematol Disord Drug Targets.* 2012; 12:35–43.
  30. Björkhem-Bergman L, Bergström H, Johansson M, Parini P, Eriksson M, Rane A, Ekström L. Atorvastatin treatment induces uptake and efflux transporters in human liver. *Drug Metab Dispos.* 2013; 41:1610–1615.
  31. Oshiro C, Mangravite L, Klein T, Altman R. PharmGKB very important pharmacogene: SLCO1B1. *Pharmacogenet Genomics.* 2010; 20:211–216.
  32. Link E, Parish S, Armitage J, Bowman L, Heath S, Matsuda F, Gut I, Lathrop M, Collins R, SEARCH Collaborative Group. SLCO1B1 variants and statin-induced myopathy—a genomewide study. *N Engl J Med.* 2008; 359:789–799.
  33. Donnelly LA, Doney AS, Tavendale R, Lang CC, Pearson ER, Colhoun HM, McCarthy MI, Hattersley AT, Morris AD, Palmer CN. Common nonsynonymous substitutions in SLCO1B1 predispose to statin intolerance in routinely treated individuals with type 2 diabetes: a go-DARTS study. *Clin Pharmacol Ther.* 2011; 89:210–216.
  34. Nies AT, Niemi M, Burk O, Winter S, Zanger UM, Stieger B, Schwab M, Schaeffeler E. Genetics is a major determinant of expression of the human hepatic uptake transporter OATP1B1, but not of OATP1B3 and OATP2B1. *Genome Med.* 2013; 5:1.
  35. Considine RV, Sinha MK, Heiman ML, Kriauciunas A, Stephens TW, Nyce MR, Ohannesian JP, Marco CC, McKee LJ, Bauer TL, Caro JF. Serum immunoreactive-leptin concentrations in normal-weight and obese humans. *N Engl J Med.* 1996; 334:292–295.
  36. Ronnema T, Karonen SL, Rissanen A, Koskenvuo M, Koivisto VA. Relation between plasma leptin levels and measures of body fat in identical twins discordant for obesity. *Ann Intern Med.* 1997; 126:26–31.
  37. Ghalandari H, Hosseini-Esfahani F, Mirmiran P. The Association of Polymorphisms in Leptin/Leptin Receptor Genes and Ghrelin/Ghrelin Receptor Genes With Overweight/Obesity and the Related Metabolic Disturbances: A Review. *Int J Endocrinol Metab.* 2015; 13:e19073.
  38. Haynes WG. Role of leptin in obesity-related hypertension. *Exp Physiol.* 2005; 90:683–688.
  39. Abu-Farha M, Behbehani K, Elkum N. Comprehensive analysis of circulating adipokines and hsCRP association with cardiovascular disease risk factors and metabolic syndrome in Arabs. *Cardiovasc Diabetol.* 2014; 13:76.
  40. Zuo H, Shi Z, Yuan B, Dai Y, Wu G, Hussain A. Association between serum leptin concentrations and insulin resistance: a population-based study from China. *PLoS One.* 2013; 8:e54615.
  41. Mirrakhimov EM, Kerimkulova AS, Lunegova OS, Mirrakhimov AE, Nabiev MP, Neronova KV, Bayramukova AA, Alibaeva NT, Satarov N. The association of leptin with dyslipidemia, arterial hypertension and obesity in Kyrgyz (Central Asian nation) population. *BMC Res Notes.* 2014; 7:411.
  42. Sahin DS, Tumer C, Demir C, Celik MM, Celik M, Ucar E, Gunesacar R. Association with leptin gene C.-2548 G>A polymorphism, serum leptin levels, and body mass index in Turkish obese patients. *Cell Biochem Biophys.* 2013; 65:243–247.
  43. O'Rourke L, Gronning LM, Yeaman SJ, Shepherd PR. Glucose-dependent regulation of cholesterol ester metabolism in macrophages by insulin and leptin. *J Biol Chem.* 2002; 277:42557–42562.
  44. VanPatten S, Ranginani N, Shefer S, Nguyen LB, Rossetti L, Cohen DE. Impaired biliary lipid secretion in obese Zucker rats: leptin promotes hepatic cholesterol clearance. *Am J Physiol Gastrointest Liver Physiol.* 2001; 281:G393–404.

45. Kim WS, Lee YS, Cha SH, Jeong HW, Choe SS, Lee MR, Oh GT, Park HS, Lee KU, Lane MD, Kim JB. Berberine improves lipid dysregulation in obesity by controlling central and peripheral AMPK activity. *Am J Physiol Endocrinol Metab.* 2009; 296:E812–819.
46. Hayashi T, Hirshman MF, Kurth EJ, Winder WW, Goodyear LJ. Evidence for 5' AMP-activated protein kinase mediation of the effect of muscle contraction on glucose transport. *Diabetes.* 1998; 47:1369–1373.
47. Neidert MC, Losa M, Regli L, Sarnthein J. Elevated serum creatine kinase after neurosurgeries in lateral position with intraoperative neurophysiological monitoring is associated with OP duration, BMI and age. *Clin Neurophysiol.* 2015; 126:2026–2032.
48. Harper CR, Jacobson TA. The broad spectrum of statin myopathy: from myalgia to rhabdomyolysis. *Curr Opin Lipidol.* 2007; 18:401–408.
49. Brancaccio P, Lippi G, Maffulli N. Biochemical markers of muscular damage. *Clin Chem Lab Med.* 2010; 48:757–767.
50. Meyer zu Schwabedissen HE, Siegmund W, Kroemer HK, Rollnik JD. Creatine kinase elevation caused by a combination of fluvastatin and telmisartan in a patient heterozygous for the CYP2C9\*3 and ABCC2 -24C > T variants: a case report. *BMC Res Notes.* 2014; 7:688.
51. Yang M, Peng S, Li W, Wan Z, Fan L, Du Y. Relationships between plasma leptin levels, leptin G2548A, leptin receptor Gln223Arg polymorphisms and gestational diabetes mellitus in Chinese population. *Sci Rep.* 2016; 6:23948.
52. Li HM, Zhang TP, Leng RX, Li XP, Wang DG, Li XM, Ye DQ, Pan HF. Association of leptin and leptin receptor gene polymorphisms with systemic lupus erythematosus in a Chinese population. *J Cell Mol Med.* 2017; 21:1732–1741.
53. Jiang S, Chen Q, Venners SA, Zhong G, Hsu YH, Xing H, Wang X, Xu X. Effect of simvastatin on plasma homocysteine levels and its modification by MTHFR C677T polymorphism in Chinese patients with primary hyperlipidemia. *Cardiovasc Ther.* 2013; 31:e27–33.
54. Brown CA, McKinney KQ, Kaufman JS, Gravel RA, Rozen R. A common polymorphism in methionine synthase reductase increases risk of premature coronary artery disease. *J Cardiovasc Risk.* 2000; 7:197–200.
55. Suriyaprom K, Tungtrongchitr R, Thawnasom K. Measurement of the levels of leptin, BDNF associated with polymorphisms LEP G2548A, LEPR Gln223Arg and BDNF Val66Met in Thai with metabolic syndrome. *Diabetol Metab Syndr.* 2014; 6:6.
